# Supplementary material
Source: HighWire-hosted journal article supplement (https://www.rcpjournals.org/highwire/filestream/13928/field_highwire_adjunct_files/0/Liu_Supplementary_material_S1.pdf)
Supplement: Liu_Supplementary_material_S1.pdf [file Liu_Supplementary_material_S1.pdf]

Supplementary material S1: Baseline characteristics of participants in the VR and control groups

| Characteristics                                    | VR group, (n=58) | Control group, a(n=59) | P-value            |
|----------------------------------------------------|------------------|------------------------|--------------------|
| Gender                                             |                  |                        | 0.521 <sup>1</sup> |
| Male                                               | 33(28.2%)        | 37(31.6%)              |                    |
| Female                                             | 25(21.4%)        | 22(18.8%)              |                    |
| Age, years                                         |                  |                        | 0.922 <sup>1</sup> |
| <60                                                | 27(23.1%)        | 28(23.9%)              |                    |
| ≥60                                                | 31(26.5%)        | 31(26.5%)              |                    |
| Marital status                                     |                  |                        | 0.644 <sup>1</sup> |
| Unmarried                                          | 28(23.9%)        | 31(26.5%)              |                    |
| Married                                            | 30(25.6%)        | 28(23.9%)              |                    |
| Education level                                    |                  |                        | 0.311 <sup>1</sup> |
| None                                               | 9(7.7%)          | 11(9.4%)               |                    |
| Primary                                            | 22(18.8%)        | 16(13.7%)              |                    |
| High                                               | 20(17.1%)        | 18(15.4%)              |                    |
| University                                         | 7(6.0%)          | 14(12.0%)              |                    |
| Final diagnosis                                    |                  |                        | 0.654 <sup>2</sup> |
| Normal                                             | 42(35.9%)        | 46(39.3%)              |                    |
| Polyps                                             | 4(3.4%)          | 4(3.4%)                |                    |
| Hemorrhoids                                        | 8(6.8%)          | 4(3.4%)                |                    |
| IBD                                                | 1(0.9%)          | 3(2.6%)                |                    |
| Neoplasia                                          | 1(0.9%)          | 0(0%)                  |                    |
| Diverticular disease                               | 2(1.7%)          | 2(1.7%)                |                    |
| Previous abdominal surgery                         |                  |                        | 0.712 <sup>1</sup> |
| Yes                                                | 14(12.0%)        | 16(13.7%)              |                    |
| No                                                 | 44(37.6%)        | 43(36.8%)              |                    |
| Previous colonoscopy                               |                  |                        | 0.791 <sup>1</sup> |
| Yes                                                | 16(13.7%)        | 15(12.8%)              |                    |
| No                                                 | 42(35.9%)        | 44(37.6%)              |                    |
| Habitual use of anxiolytic or antidepressant drugs |                  |                        | 0.980 <sup>2</sup> |
| Yes                                                | 4(3.4%)          | 4(3.4%)                |                    |
| No                                                 | 54(46.2%)        | 55(47.0%)              |                    |
| Anxiety score                                      |                  |                        | 0.056 <sup>3</sup> |
| Normal                                             | 44(37.6%)        | 35(29.9%)              |                    |
| Mild                                               | 10(8.5%)         | 16(13.7%)              |                    |
| Moderate                                           | 4(3.4%)          | 7(6.0%)                |                    |
| Severe                                             | 0(0%)            | 1(0.9%)                |                    |
| Extremely Severe                                   | 0(0%)            | 0(0%)                  |                    |

IBD: inflammatory bowel disease, VR: virtual reality

1 Chi-square test.

2 Fisher's Exact test.

3 Mann-Whitney U test.
